# Supplementary material
Source: ML conference proceedings conference paper supplement (https://openreview.net/forum?id=n5bPL58uMC)

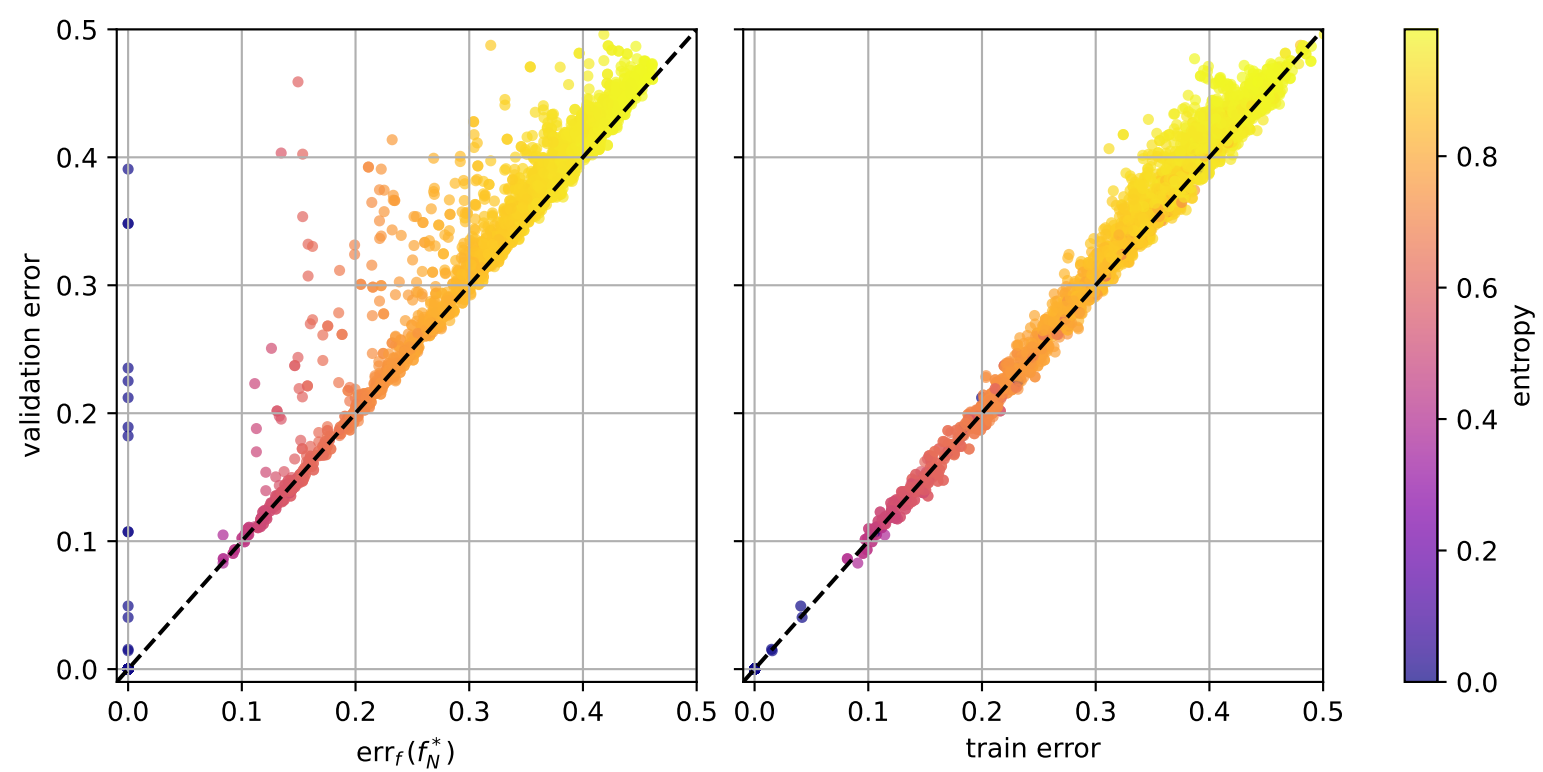

Supplement: supplementary_material [file app_fig2_overfit.pdf › noise-robust-boolean-learning-main/mindreadingautobots/src/mindreadingautobots/analysis/figures/app_fig2_overfit.pdf]

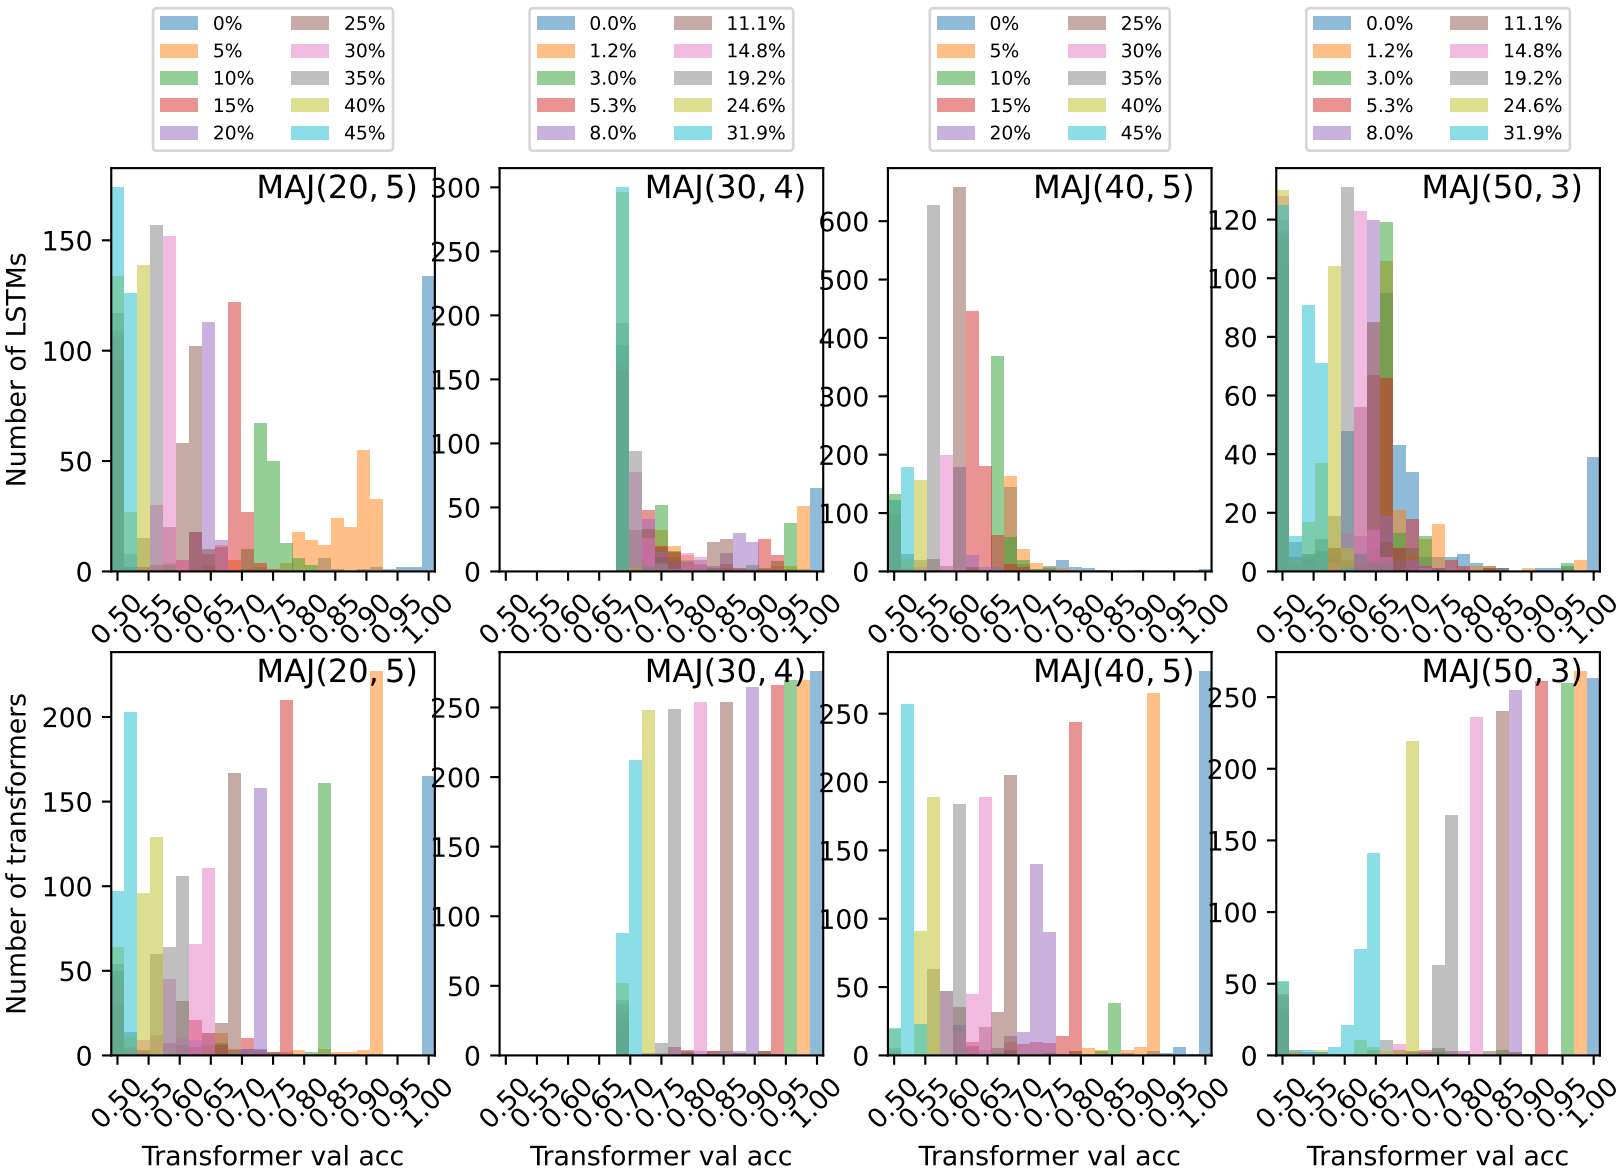

Supplement: supplementary_material [file appendix_fig1.pdf › noise-robust-boolean-learning-main/mindreadingautobots/src/mindreadingautobots/analysis/figures/appendix_fig1.pdf]

# PARITY(20, 4)

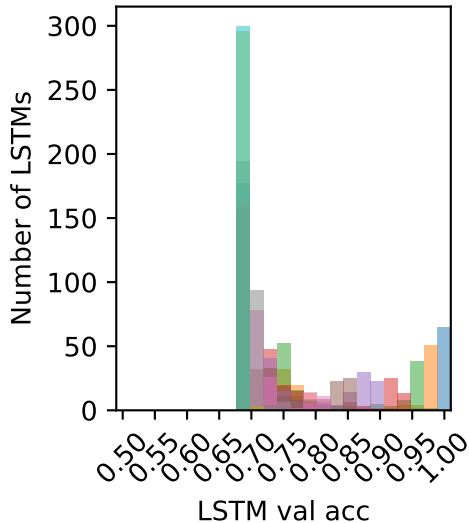

# PARITY(20, 4)

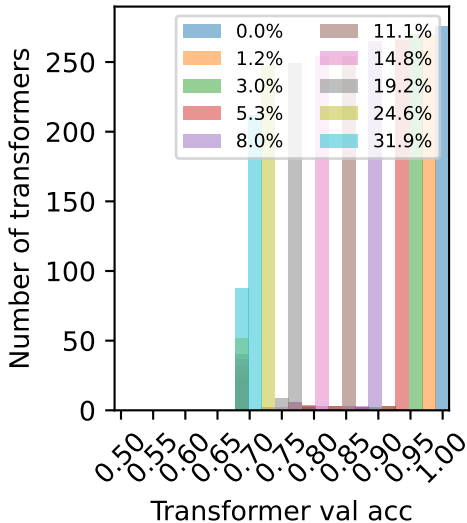

Supplement: supplementary_material [file appendix_fig2.pdf › noise-robust-boolean-learning-main/mindreadingautobots/src/mindreadingautobots/analysis/figures/appendix_fig2.pdf]

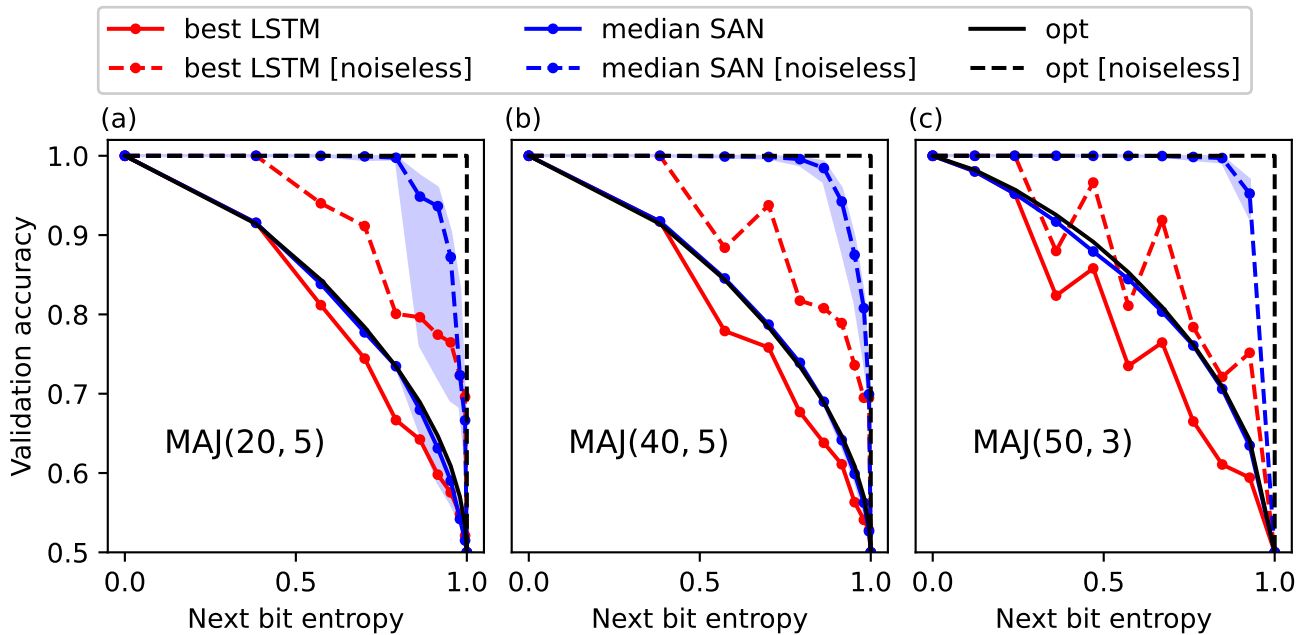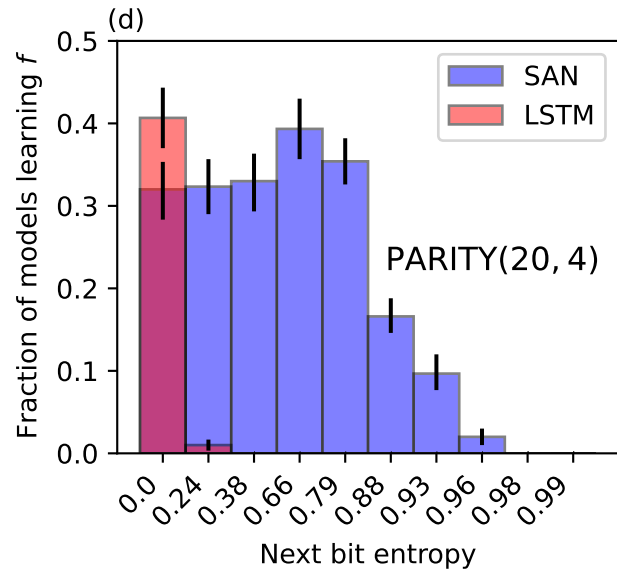

Supplement: supplementary_material [file fig1.pdf › noise-robust-boolean-learning-main/mindreadingautobots/src/mindreadingautobots/analysis/figures/fig1.pdf]

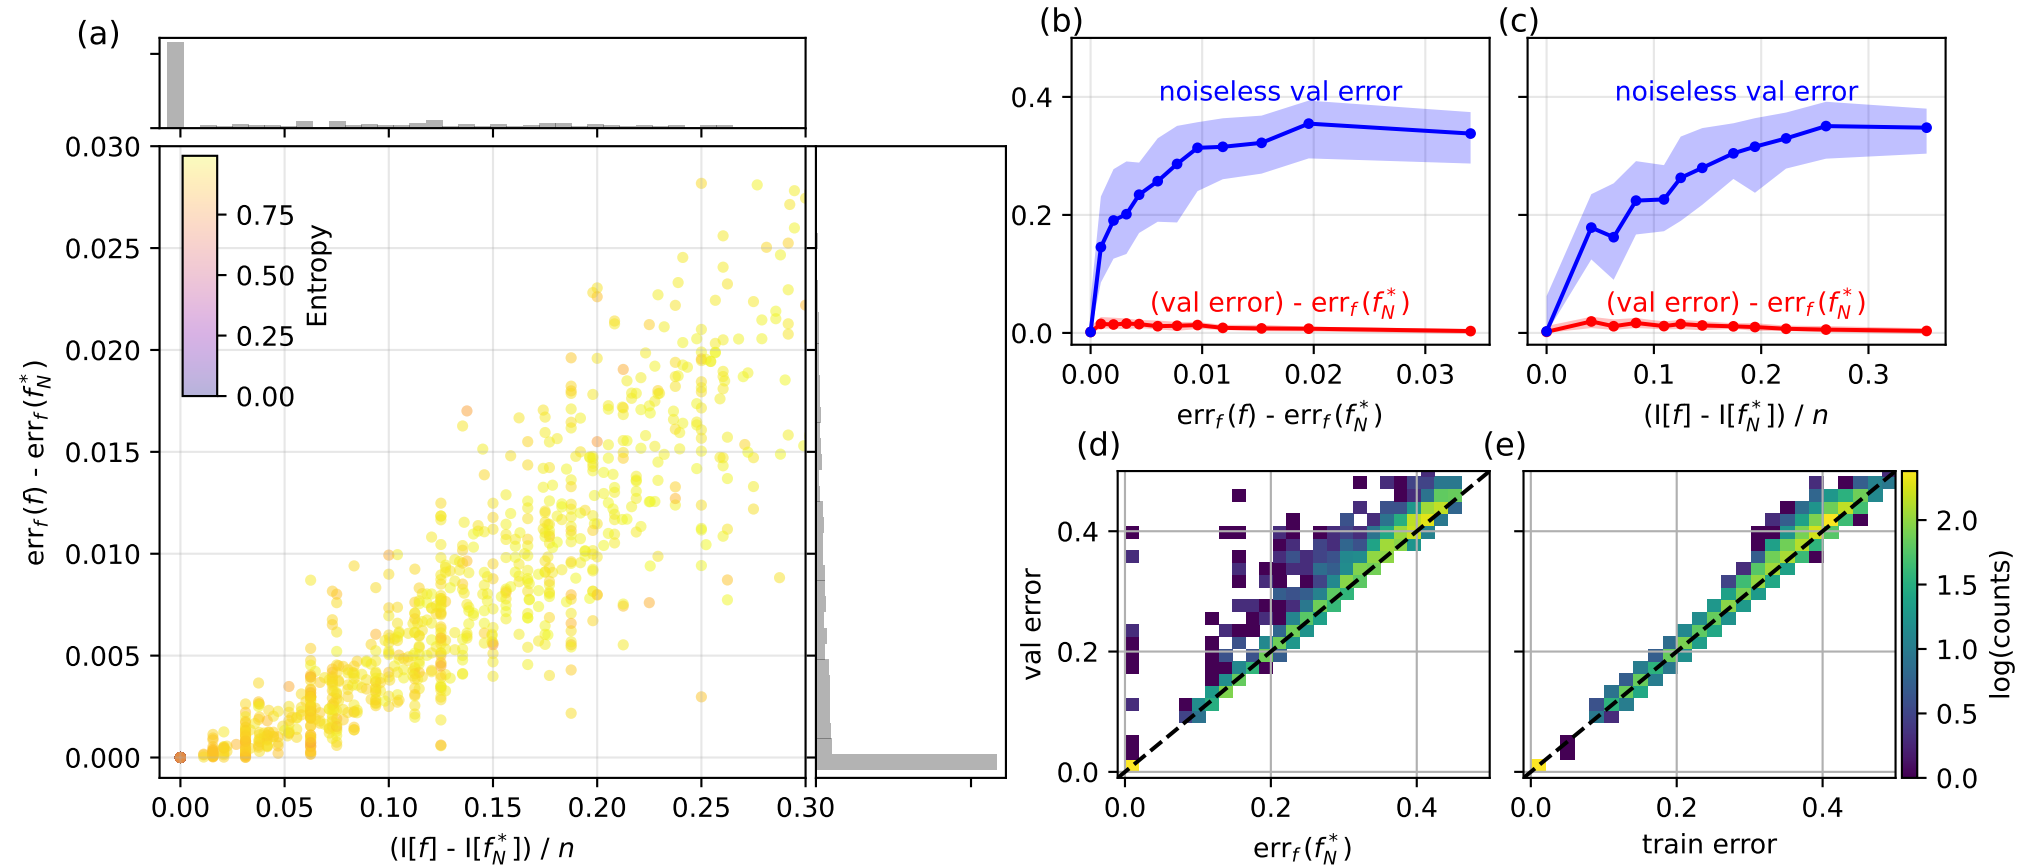

Supplement: supplementary_material [file fig2.pdf › noise-robust-boolean-learning-main/mindreadingautobots/src/mindreadingautobots/analysis/figures/fig2.pdf]

— SAN — LSTM — SAN+ $\lambda$

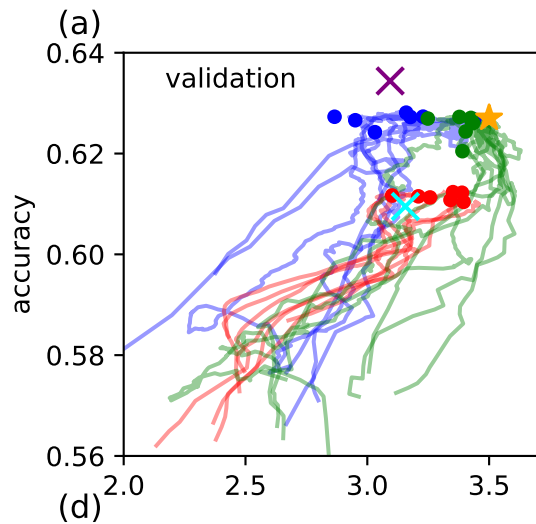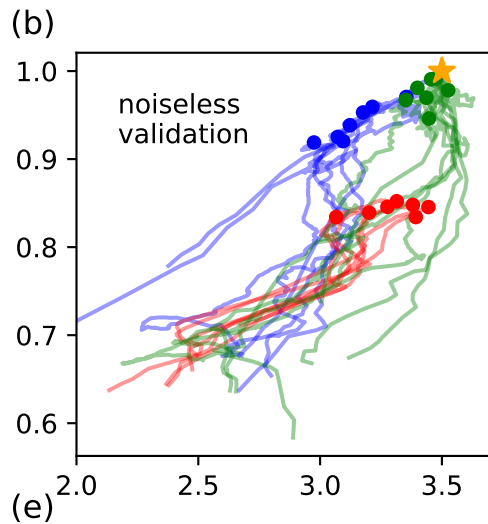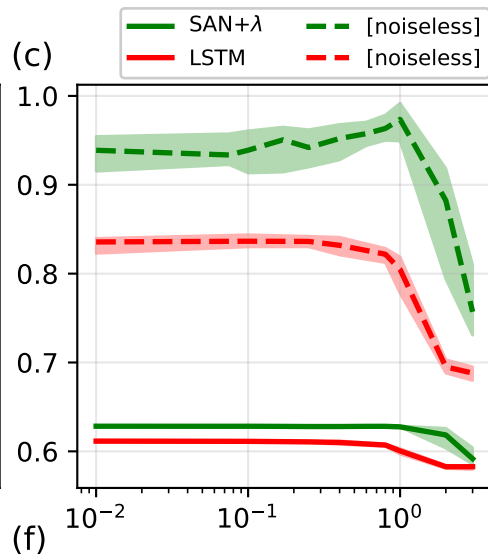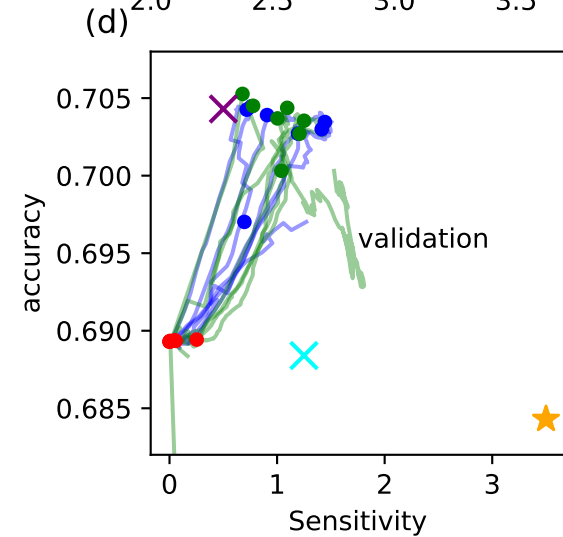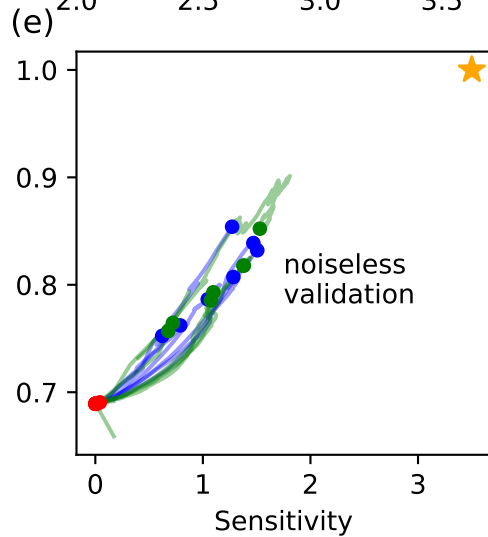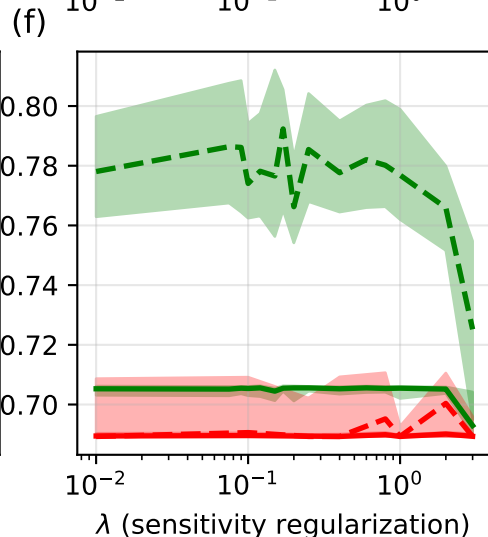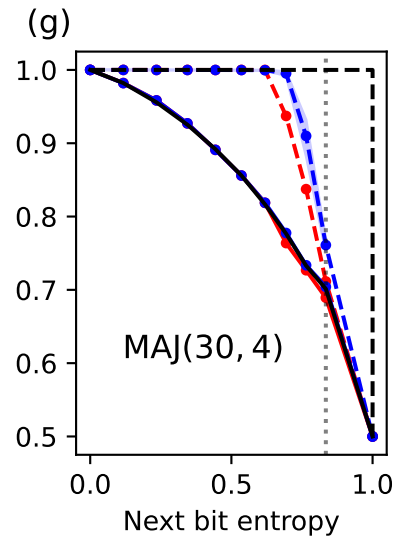

Supplement: supplementary_material [file fig3.pdf › noise-robust-boolean-learning-main/mindreadingautobots/src/mindreadingautobots/analysis/figures/fig3.pdf]
